# Supplementary material
Source: Springer Nature journal article supplement (https://www.springermedizin.de/resource/supplementary/12936_2009_1116_MOESM1_ESM.pdf/9549790)

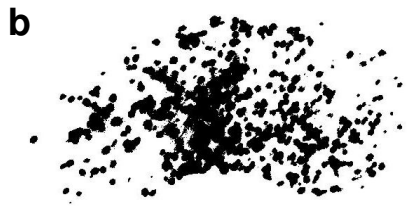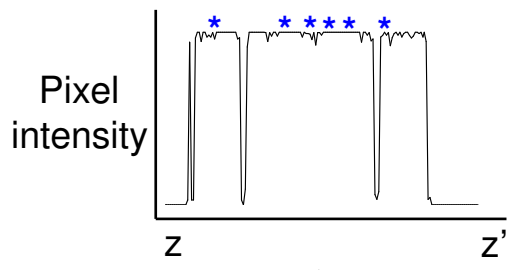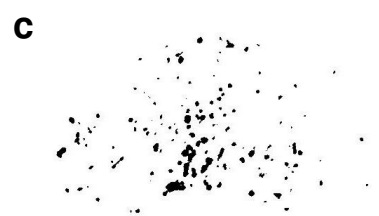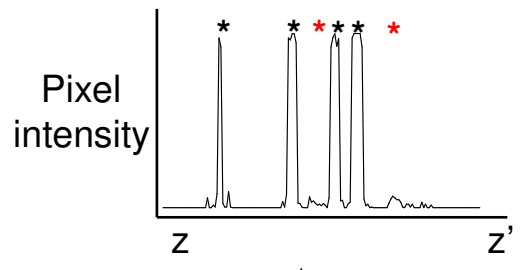

Low threshold

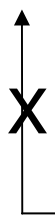

**a** Original image

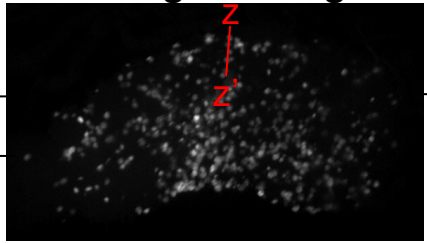

High threshold

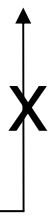

2 pixel shift and subtraction

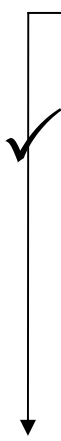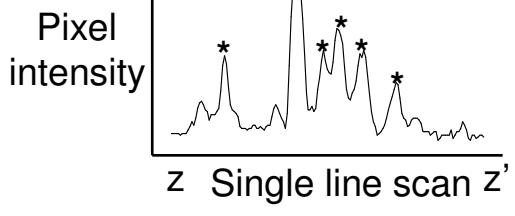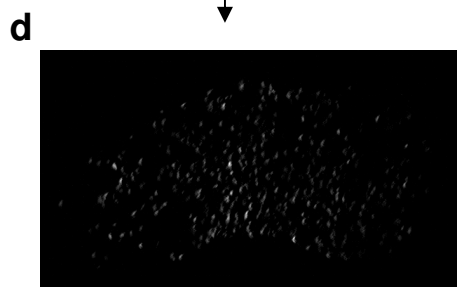

Standard threshold

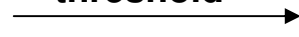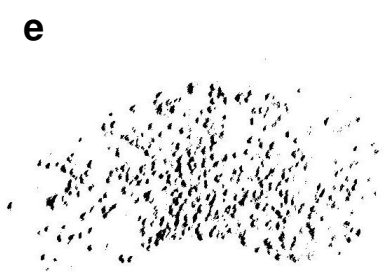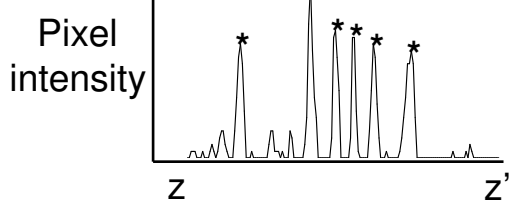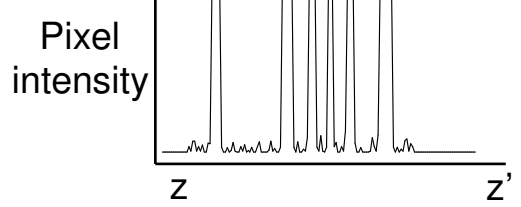

Supplement: MOESM1 [file 9549790]
